# Supplementary material for: Systematic solvate screening of trospium chloride: discovering hydrates of a long-established pharmaceutical
Source: Royal Society of Chemistry journal article supplement (doi:10.1039/c5ce00744e), 2015-01-01
Supplement: c5ce00744e1.pdf [file c5ce00744e1.pdf]

### Supporting information

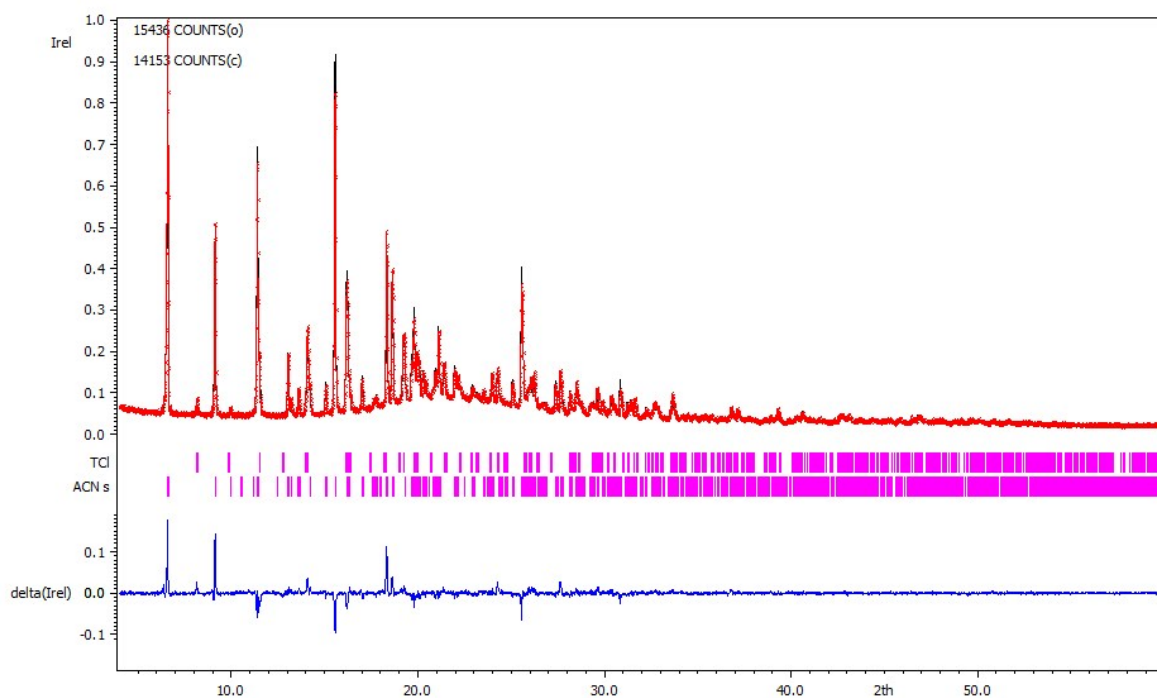

Figure 1 Final Rietveld plot of TCI ACN solvate showing the measured data (red line), calculated data (black line) and difference curve (blue line). Calculated Bragg positions are shown by vertical bars (top row: TCI, bottom row: TCI ACN).

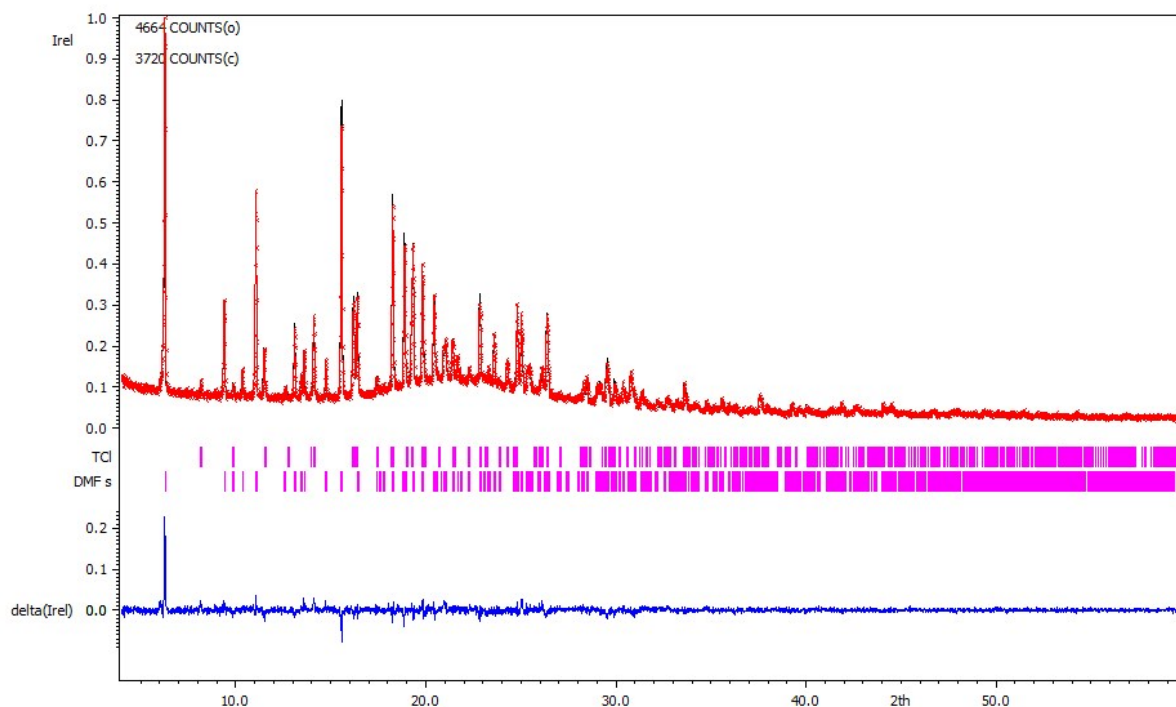

Figure 2 Final Rietveld plot of TCI DMF solvate showing the measured data (red line), calculated data (black line) and difference curve (blue line). Calculated Bragg positions are shown by vertical bars (top row: TCI, bottom row: TCI DMF).

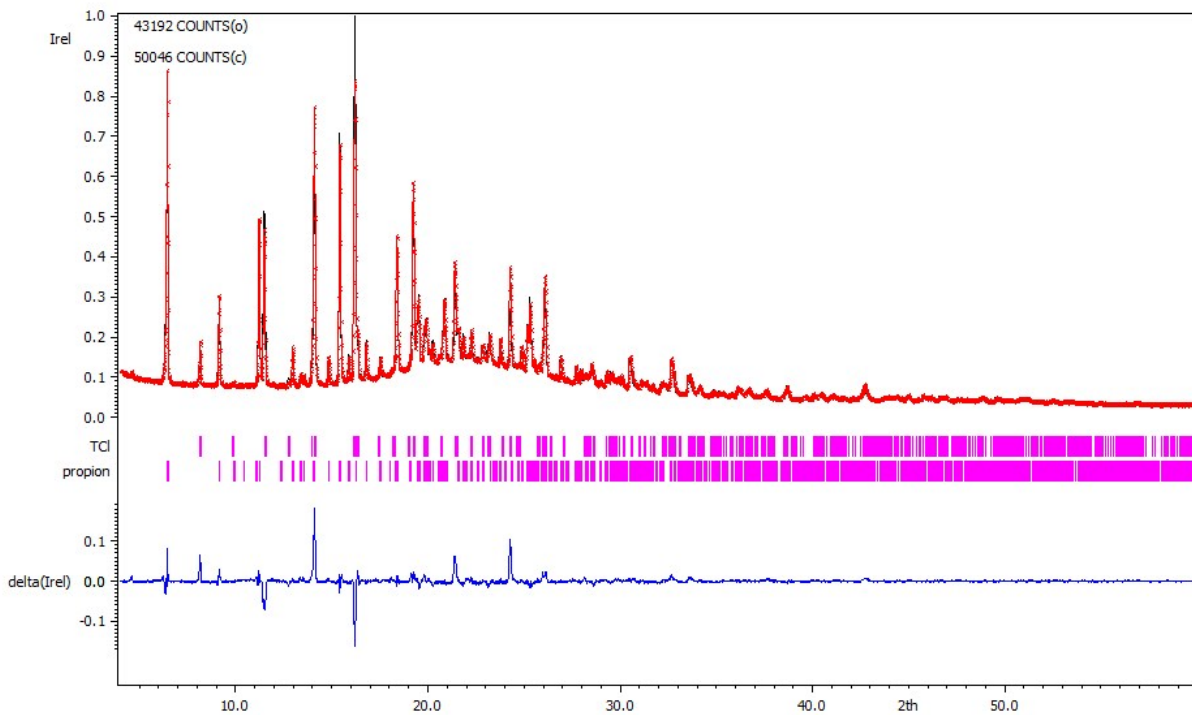

Figure 3 Final Rietveld plot of TCl propionitrile solvate showing the measured data (red line), calculated data (black line) and difference curve (blue line). Calculated Bragg positions are shown by vertical bars (top row: TCl, bottom row: TCl propionitrile).

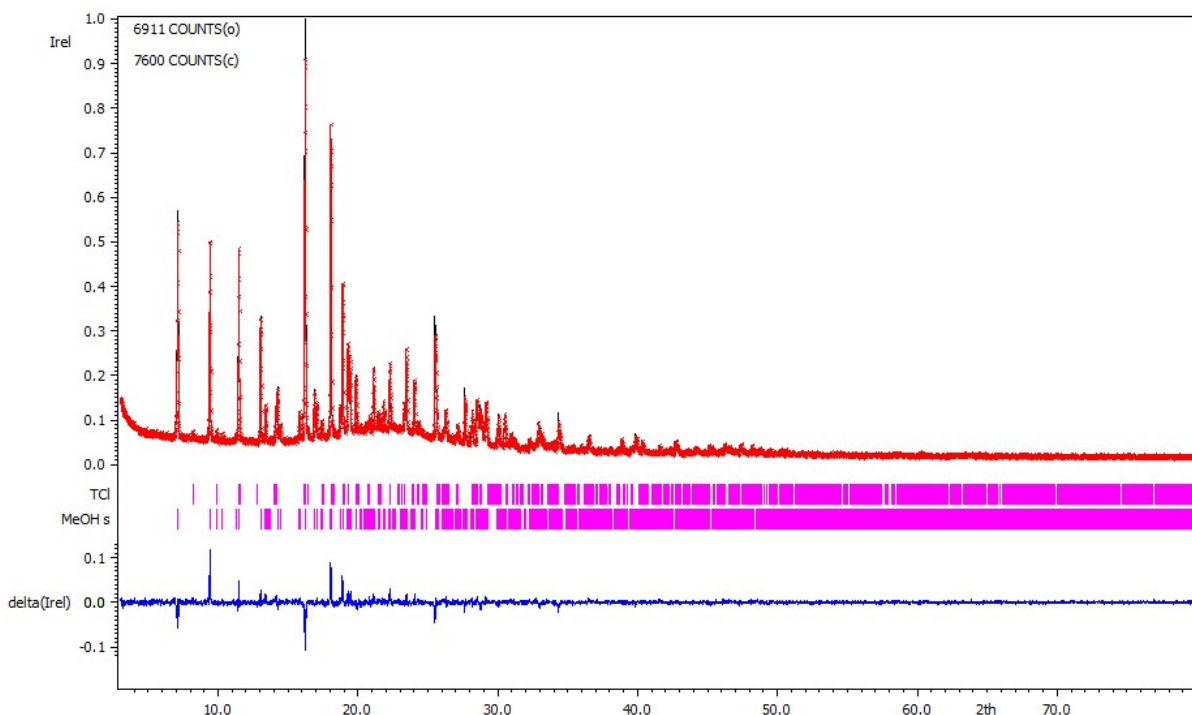

Figure 4 Final Rietveld plot of TCl MeOH solvate showing the measured data (red line), calculated data (black line) and difference curve (blue line). Calculated Bragg positions are shown by vertical bars (top row: TCl, bottom row: TCl MeOH).

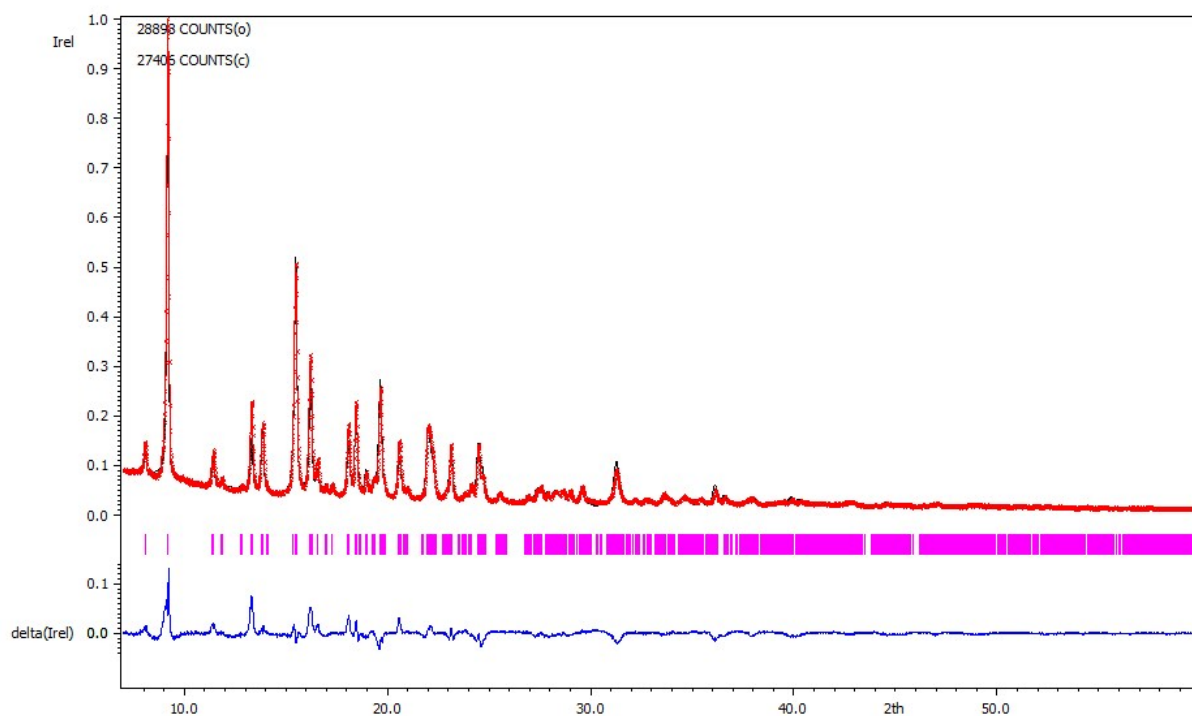

Figure 5 Final Rietveld plot of TCI dihydrate showing the measured data (red line), calculated data (black line) and difference curve (blue line). Calculated Bragg positions are shown by vertical bars.

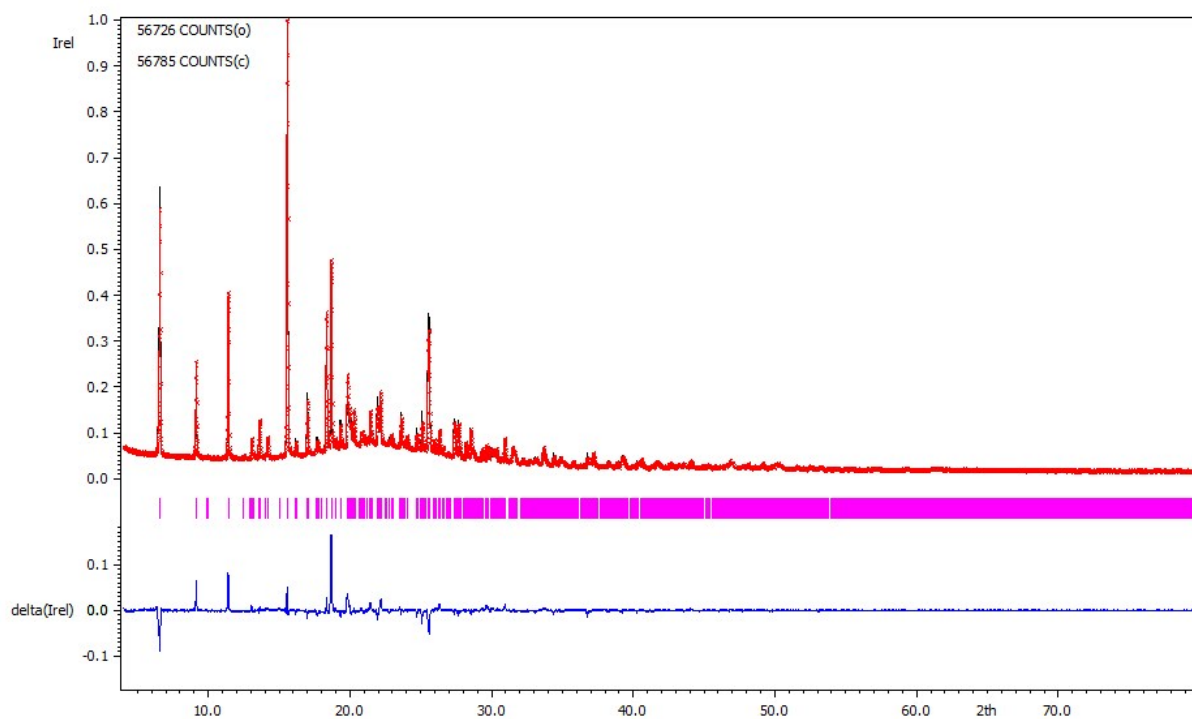

Figure 6. Final Rietveld plot of TCI nitromethane solvate showing the measured data (red line), calculated data (line) and difference curve (blue line). Calculated Bragg positions are shown by vertical bars.

Table 1. UV-Vis solubility measurement in detail. Solubility is expressed within relative deviation.

| Solvent | Dilution of saturated solution | Lambda max (nm) | %RSD ( $q_{0.95}$ ) | Solubility (mg/mL) |
|---------|--------------------------------|-----------------|---------------------|--------------------|
| ACN     | 1.667x                         | 257.6           | 3.70                | 0.94               |
| DMF     | 2.5x                           | 264.2           | 3.10                | 1.85               |
| PRN     | 312.5x                         | 221.0           | n.a.                | 0.17               |
| WA      | 1000x                          | 257.2           | 0.75                | 606                |

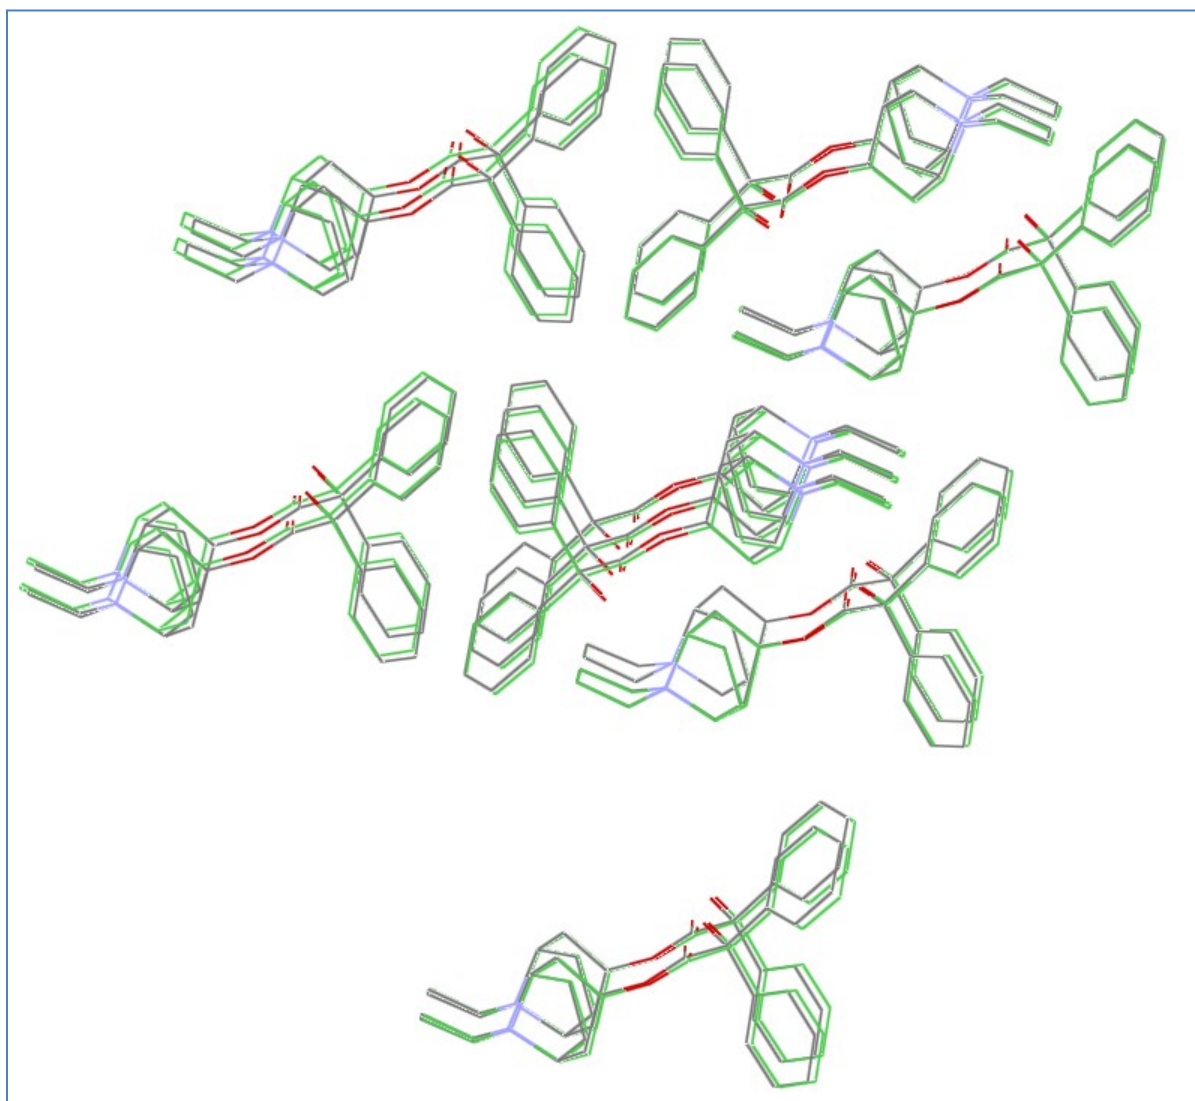

Figure 7. Example from crystal packing similarity calculation for the construction of a tree diagram. For TCI DMF (gray) and ACN (green) solvates, all 15 molecules of trospium in the clusters fit to each other.

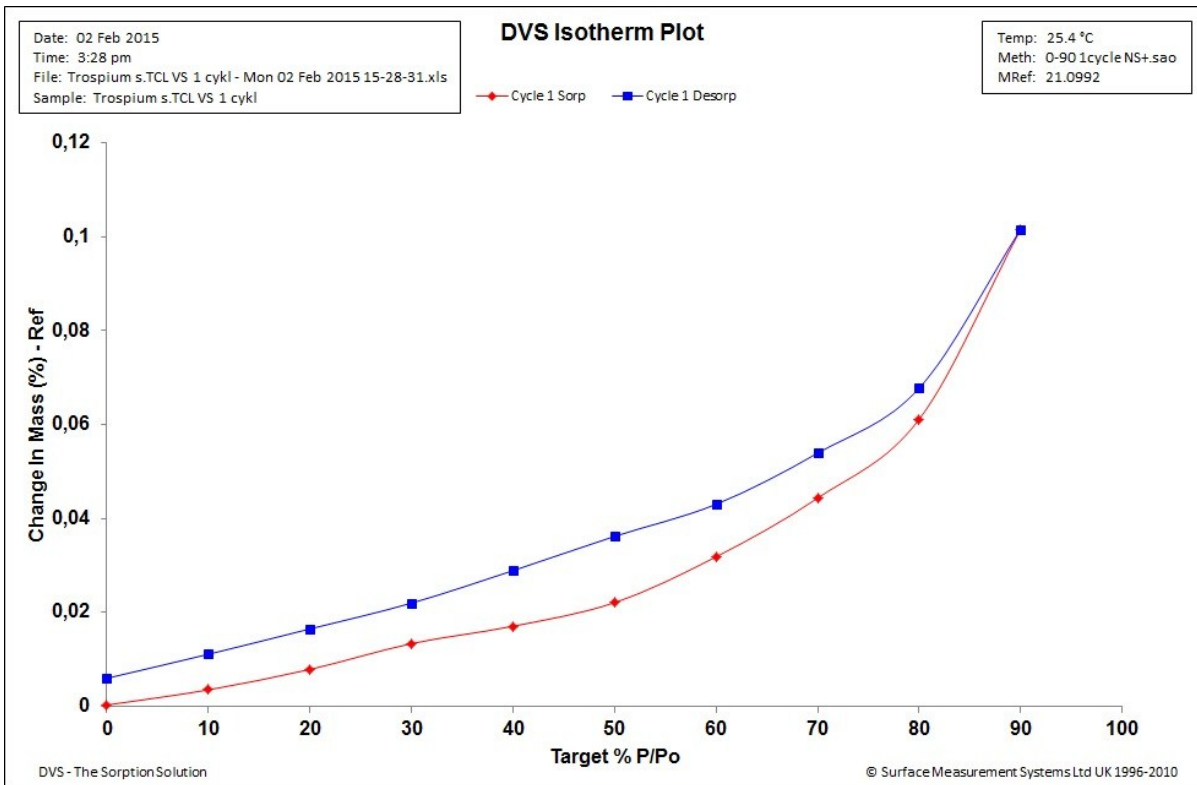

Figure 8. The dynamic vapor sorption curves of trospium chloride polymorf I. The bulk was not hygroscopic and increased its weight up till 0.1 wt. %.

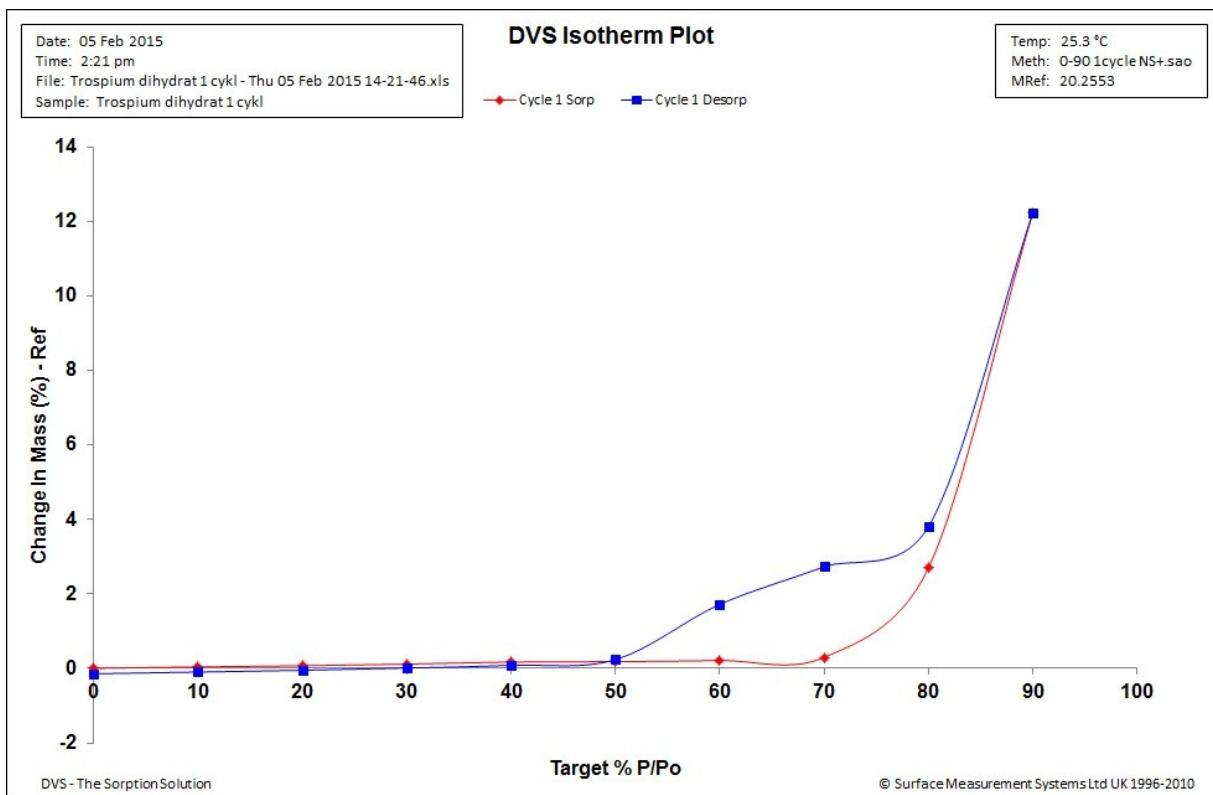

Figure 9. The dynamic vapor sorption curves of trospium chloride dihydrate (8). The bulk was hygroscopic above 70 % of RH and increased its weight up till 13 wt. %, the crystalline material partly dissolved.

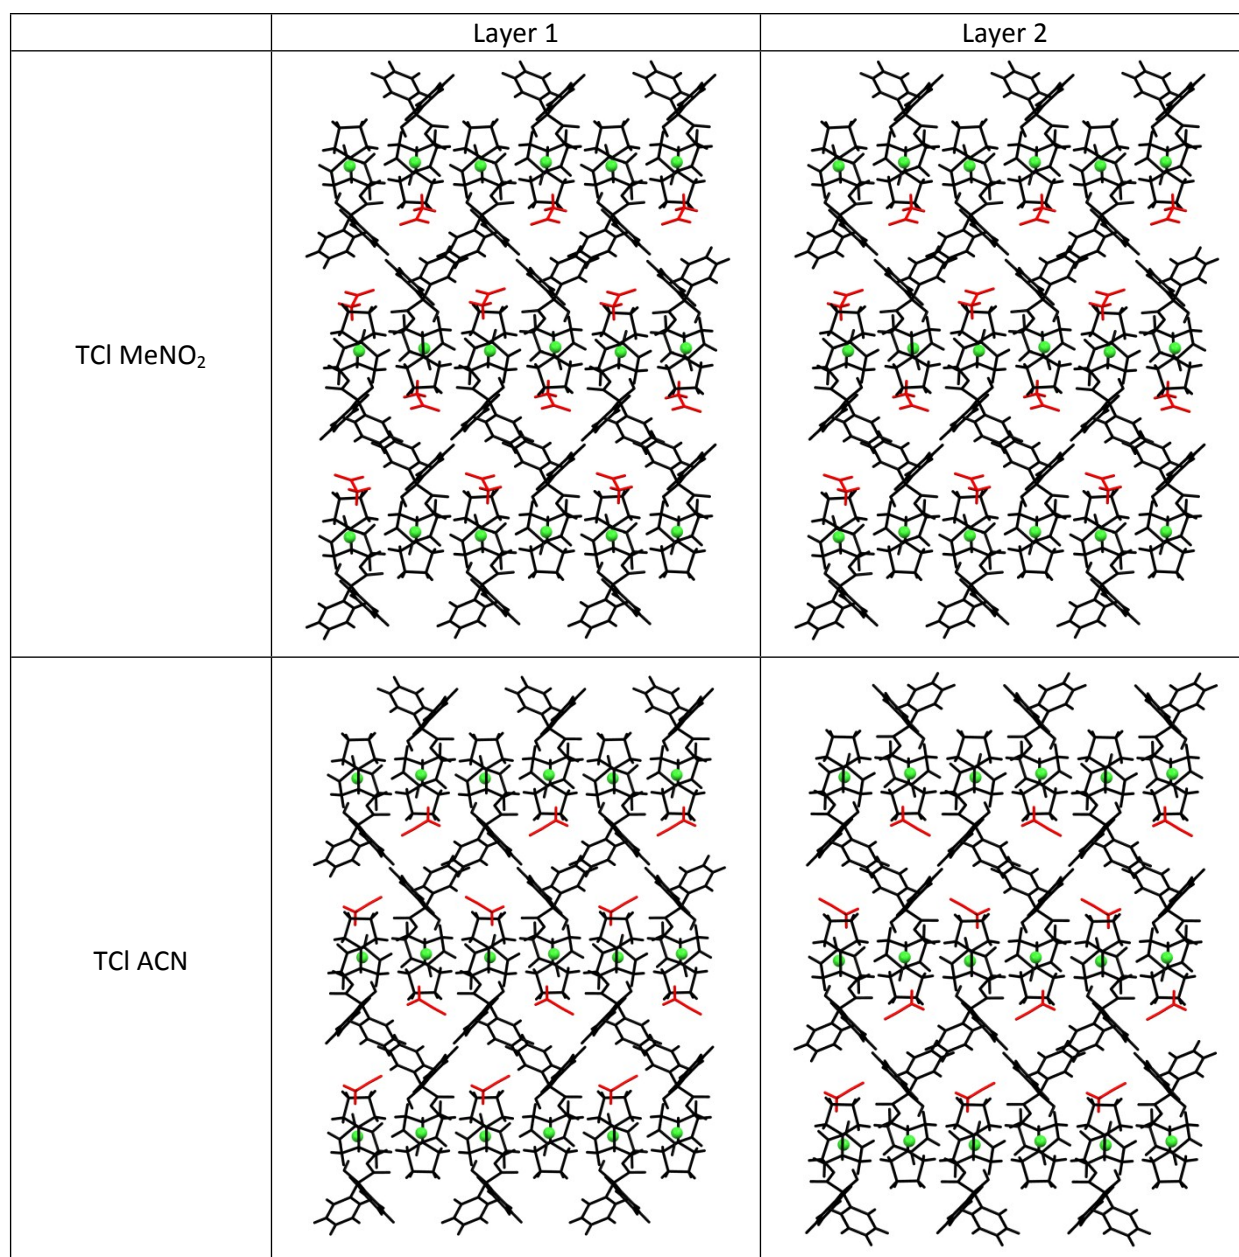

Figure 10. Layers in red branch protic x aprotic demonstrated on TCI ACN and TCI MeNO<sub>2</sub>.

The C(ar)–H...X interaction is aprotic part of red branch.

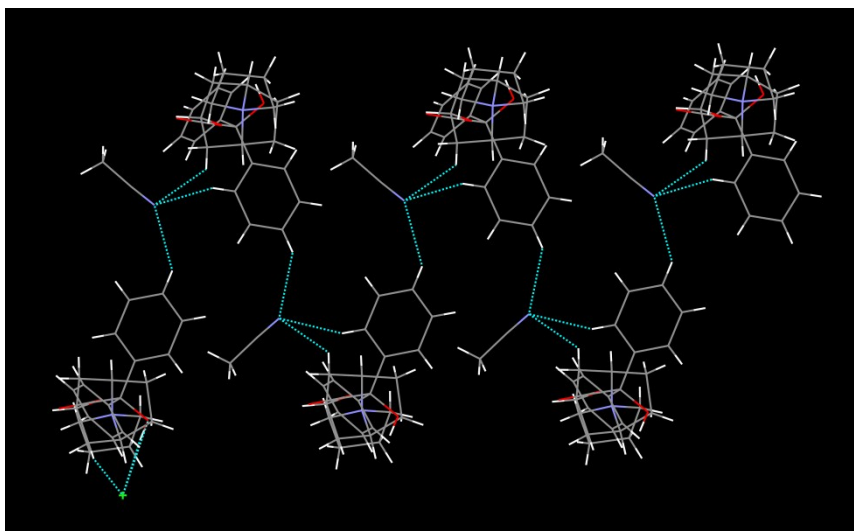

Figure 11. TCI ACN

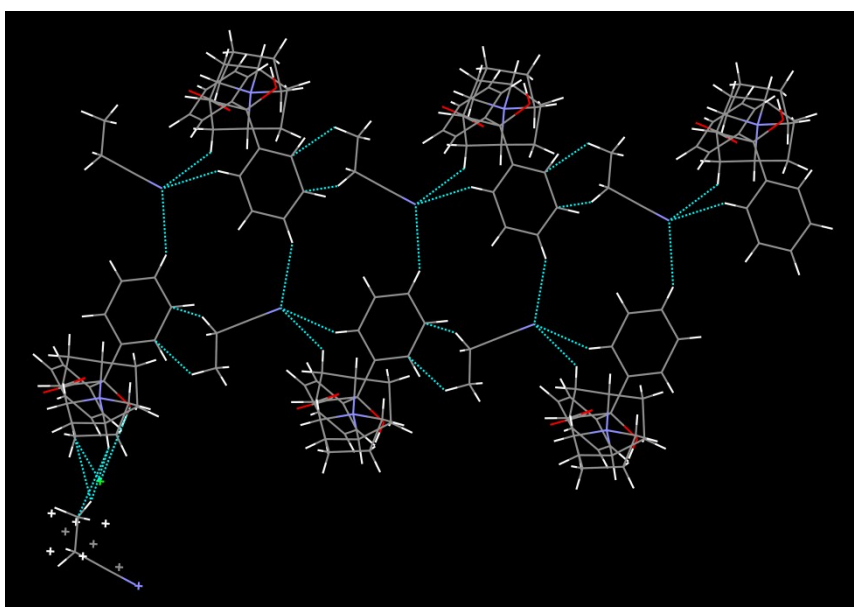

Figure 12. TCI PRN

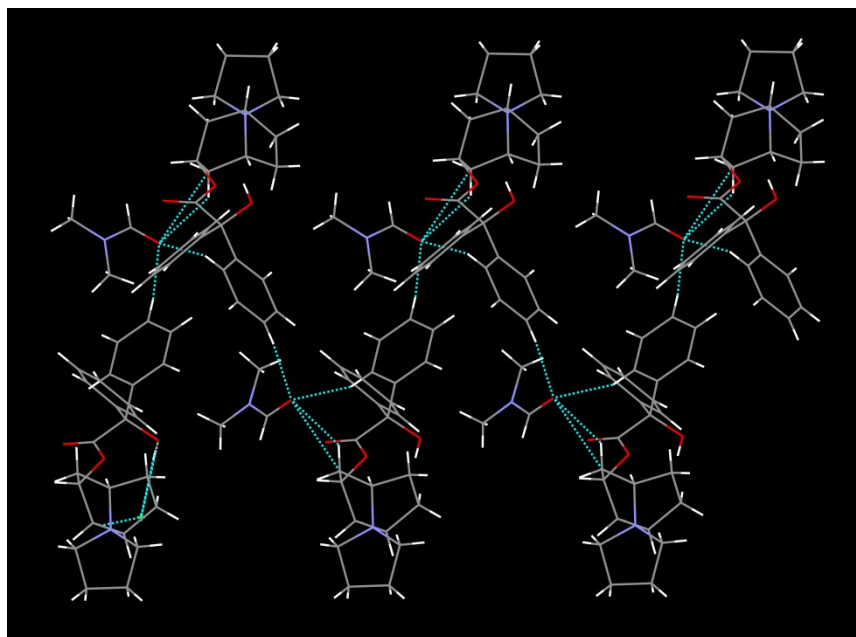

Figure 13. TCI DMF

Table 2. Table of hydrogen bonds of solvates with ACN, DMF and *i*PrOH

| solvate                       | D–H...A                         | D–H (Å)    | H...A (Å)   | D...A (Å)   | D–H...A (°) |
|-------------------------------|---------------------------------|------------|-------------|-------------|-------------|
| ACN                           | O3–H1o3...Cl1                   | 0.820 (16) | 2.242 (14)  | 3.0579 (14) | 173.6 (19)  |
|                               | C10–H1c10...N1s <sup>i</sup>    | 0.96       | 2.84        | 3.739 (4)   | 157         |
|                               | C12–H1c12...N1s                 | 0.96       | 2.71        | 3.502 (3)   | 140         |
|                               | C16–H1c16...O3 <sup>ii</sup>    | 0.96       | 2.66        | 3.618 (2)   | 173         |
|                               | C17–H1c17...O2 <sup>iii</sup>   | 0.96       | 2.49        | 3.259 (2)   | 138         |
|                               | C18–H1c18...Cl1 <sup>iii</sup>  | 0.96       | 2.81        | 3.6532 (18) | 147         |
|                               | C20–H1c20...Cl1 <sup>iv</sup>   | 0.96       | 2.99        | 3.7742 (16) | 140         |
|                               | C21–H1c21...N1s <sup>i</sup>    | 0.96       | 2.71        | 3.454 (4)   | 134         |
|                               | C21–H2c21...Cl1 <sup>ii</sup>   | 0.96       | 2.94        | 3.7157 (19) | 139         |
|                               | C22–H1c22...Cl1 <sup>iv</sup>   | 0.96       | 2.95        | 3.7827 (17) | 146         |
|                               | C22–H2c22...Cl1 <sup>ii</sup>   | 0.96       | 2.93        | 3.7612 (19) | 146         |
| C25–H2c25...Cl1 <sup>iv</sup> | 0.96                            | 2.86       | 3.7031 (19) | 148         |             |
| DMF                           | O3–H1o3...Cl1                   | 0.820 (10) | 2.285 (11)  | 3.1009 (12) | 173.1 (18)  |
|                               | C4–H1c4...O1s <sup>i</sup>      | 0.96       | 2.53        | 3.417 (2)   | 154         |
|                               | C6–H1c6...O1s <sup>ii</sup>     | 0.96       | 2.42        | 3.371 (3)   | 173         |
|                               | C16–H1c16...O1s <sup>i</sup>    | 0.96       | 2.43        | 3.162 (2)   | 133         |
|                               | C17–H1c17...Cl1 <sup>iii</sup>  | 0.96       | 2.94        | 3.7485 (12) | 143         |
|                               | C19–H2c19...Cl1 <sup>iv</sup>   | 0.96       | 2.94        | 3.8048 (12) | 150         |
|                               | C20–H1c20...O2 <sup>iv</sup>    | 0.96       | 2.48        | 3.2629 (18) | 138         |
|                               | C21–H1c21...Cl1                 | 0.96       | 2.86        | 3.7918 (11) | 164         |
|                               | C22–H1c22...Cl1 <sup>iii</sup>  | 0.96       | 3.03        | 3.8574 (13) | 146         |
|                               | C25–H2c25...Cl1 <sup>iii</sup>  | 0.96       | 2.88        | 3.7426 (15) | 150         |
| <i>i</i> PrOH                 | O3–H1o3...Cl1 <sup>i</sup>      | 0.820 (19) | 2.264 (18)  | 3.0768 (14) | 170.8 (18)  |
|                               | O1sa–H1o1sa...Cl1 <sup>ii</sup> | 0.89 (3)   | 2.28 (3)    | 3.127 (2)   | 161 (3)     |
|                               | O1sb–H1o1sb...Cl1 <sup>ii</sup> | 0.89 (4)   | 2.38 (4)    | 3.20 (2)    | 154 (5)     |
|                               | C17–H1c17...Cl1                 | 0.96       | 2.92        | 3.7839 (17) | 151         |
|                               | C19–H2c19...Cl1 <sup>iii</sup>  | 0.96       | 2.84        | 3.764 (2)   | 163         |



|  |                                 |      |      |             |     |
|--|---------------------------------|------|------|-------------|-----|
|  | C20–H1c20...O2                  | 0.96 | 2.45 | 3.307 (2)   | 148 |
|  | C21–H1c21...Cl1 <sup>i</sup>    | 0.96 | 2.89 | 3.8363 (17) | 169 |
|  | C22–H1c22...Cl1 <sup>ii</sup>   | 0.96 | 2.82 | 3.6870 (19) | 151 |
|  | C24–H1c24...O1sa <sup>iii</sup> | 0.96 | 2.62 | 3.212 (3)   | 120 |
|  | C24–H1c24...O1sb <sup>iii</sup> | 0.96 | 2.49 | 3.20 (2)    | 130 |
|  | C24–H2c24...O2 <sup>iv</sup>    | 0.96 | 2.50 | 3.379 (3)   | 153 |
|  | C25–H1c25...Cl1                 | 0.96 | 2.96 | 3.854 (2)   | 156 |
|  | C25–H2c25...Cl1 <sup>iii</sup>  | 0.96 | 2.97 | 3.914 (2)   | 168 |

Symmetry codes: ACN: (i)  $-x+3/2, y-1/2, -z+1/2$  (ii)  $-x+1/2, y-1/2, -z+1/2$  (iii)  $-x+1/2, y+1/2, -z+1/2$  (iv)  $x+1/2, -y+1/2, z+1/2$  DMF: (i)  $-x+1, y-1/2, -z+1/2$  (ii)  $x, -y+3/2, z+1/2$  (iii)  $-x+2, y+1/2, -z+1/2$  iPrOH: (i)  $x-1, y, z$  (ii)  $-x+3/2, y+1/2, -z+1/2$  (iii)  $-x+3/2, y-1/2, -z+1/2$  (iv)  $-x+1/2, y-1/2, -z+1/2$

Table 3. Table of hydrogen bonds of solvates with MeOH, MeNO<sub>2</sub> and PRN

| solvate                        | D–H...A                        | D–H (Å)    | H...A (Å)   | D...A (Å)   | D–H...A (°) |
|--------------------------------|--------------------------------|------------|-------------|-------------|-------------|
| MeOH                           | O3–H1o3...Cl1                  | 0.820 (15) | 2.297 (15)  | 3.1136 (16) | 174 (2)     |
|                                | O1s–H1o1s...Cl1                | 0.820 (14) | 2.405 (16)  | 3.131 (4)   | 148.0 (12)  |
|                                | O1s'–H1o1s...Cl1               | 0.82 (2)   | 2.405 (16)  | 3.087 (14)  | 141.1 (15)  |
|                                | C5–H1c5...O2 <sup>i</sup>      | 0.96       | 2.68        | 3.630 (3)   | 169         |
|                                | C8–H1c8...Cl1                  | 0.96       | 2.74        | 3.648 (2)   | 158         |
|                                | C12–H1c12...O1s <sup>ii</sup>  | 0.96       | 2.70        | 3.405 (4)   | 130         |
|                                | C16–H1c16...Cl1                | 0.96       | 2.91        | 3.8442 (18) | 166         |
|                                | C17–H1c17...O2 <sup>iii</sup>  | 0.96       | 2.62        | 3.334 (2)   | 131         |
|                                | C18–H1c18...O2 <sup>iii</sup>  | 0.96       | 2.71        | 3.373 (3)   | 127         |
|                                | C20–H1c20...Cl1 <sup>iv</sup>  | 0.96       | 2.95        | 3.7705 (19) | 144         |
|                                | C22–H1c22...Cl1 <sup>iv</sup>  | 0.96       | 3.04        | 3.883 (2)   | 147         |
|                                | C22–H2c22...Cl1 <sup>v</sup>   | 0.96       | 2.93        | 3.763 (2)   | 146         |
| C25–H2c25...Cl1 <sup>iv</sup>  | 0.96                           | 2.96       | 3.813 (2)   | 148         |             |
| MeNO <sub>2</sub>              | O3–H1o3...Cl1 <sup>i</sup>     | 0.820 (17) | 2.246 (16)  | 3.0642 (14) | 175.7 (18)  |
|                                | C16–H1c16...Cl1 <sup>i</sup>   | 0.96       | 2.95        | 3.8941 (19) | 168         |
|                                | C17–H1c17...O2 <sup>ii</sup>   | 0.96       | 2.43        | 3.228 (2)   | 140         |
|                                | C18–H1c18...Cl1 <sup>iii</sup> | 0.96       | 2.77        | 3.6424 (18) | 152         |
|                                | C20–H1c20...Cl1                | 0.96       | 3.02        | 3.8109 (19) | 141         |
|                                | C21–H1c21...Cl1 <sup>iv</sup>  | 0.96       | 2.94        | 3.7107 (19) | 138         |
|                                | C22–H2c22...Cl1 <sup>iv</sup>  | 0.96       | 2.93        | 3.7844 (19) | 149         |
|                                | C23–H1c23...O2s <sup>iii</sup> | 0.96       | 2.63        | 3.463 (4)   | 145         |
|                                | C25–H2c25...Cl1                | 0.96       | 2.74        | 3.631 (2)   | 155         |
|                                | C1s–H1c1s...O2                 | 0.96       | 2.66        | 3.511 (3)   | 148         |
| C1s–H3c1s...Cl1 <sup>vi</sup>  | 0.96                           | 2.75       | 3.678 (3)   | 164         |             |
| PRN                            | O3–H1o3...Cl1                  | 0.820 (10) | 2.249 (11)  | 3.0614 (12) | 171.0 (19)  |
|                                | C6–H1c6...N1sa <sup>i</sup>    | 0.96       | 2.59        | 3.420 (5)   | 145         |
|                                | C6–H1c6...N1sb <sup>i</sup>    | 0.96       | 2.57        | 3.408 (14)  | 146         |
|                                | C16–H2c16...N1sa <sup>ii</sup> | 0.96       | 2.63        | 3.411 (7)   | 138         |
|                                | C16–H2c16...N1sb <sup>ii</sup> | 0.96       | 2.62        | 3.418 (18)  | 141         |
|                                | C17–H1c17...Cl1 <sup>iii</sup> | 0.96       | 2.94        | 3.7438 (14) | 141         |
|                                | C19–H2c19...Cl1 <sup>iv</sup>  | 0.96       | 2.88        | 3.7319 (15) | 149         |
|                                | C20–H1c20...O2 <sup>iv</sup>   | 0.96       | 2.51        | 3.266 (2)   | 135         |
|                                | C22–H1c22...Cl1 <sup>ii</sup>  | 0.96       | 2.90        | 3.7526 (15) | 148         |
|                                | C22–H2c22...Cl1 <sup>iii</sup> | 0.96       | 2.94        | 3.7805 (15) | 147         |
| C25–H1c25...Cl1 <sup>iii</sup> | 0.96                           | 2.89       | 3.7351 (16) | 148         |             |

Symmetry codes: MeOH: (i)  $-x+2,-y+1,-z$  (ii)  $x+1,y,z$  (iii)  $-x+3/2,y+1/2,-z+1/2$  (iv)  $x+1/2,-y+3/2,z+1/2$  (v)  $-x+3/2,y-1/2,-z+1/2$  MeNO<sub>2</sub>: (i)  $x-1,y,z$  (ii)  $-x+1/2,y+1/2,-z+1/2$  (iii)  $-x+3/2,y+1/2,-z+1/2$  (iv)  $-x+3/2,y-1/2,-z+1/2$  PRN: (i)  $x+1,y,z$  (ii)  $-x+3/2,y+1/2,-z+1/2$  (iii)  $x+1/2,-y+1/2,z+1/2$  (iv)  $-x+3/2,y-1/2,-z+1/2$

Table 4. Table of hydrogen bonds of TCl sesquihydrate and TCl dihydrate

| solvate                          | D-H...A                          | D-H (Å)    | H...A (Å)  | D...A (Å)   | D-H...A (°) |
|----------------------------------|----------------------------------|------------|------------|-------------|-------------|
| sesHyd                           | O3a-H1o3a...Cl1a                 | 0.820 (8)  | 2.255 (7)  | 3.0706 (11) | 172.7 (19)  |
|                                  | O3b-H1o3b...Cl1b <sup>i</sup>    | 0.820 (9)  | 2.217 (8)  | 3.0323 (11) | 172 (2)     |
|                                  | O1w-H1o1w...Cl1b                 | 0.820 (18) | 2.299 (18) | 3.1129 (14) | 172 (2)     |
|                                  | O1w-H2o1w...O2b                  | 0.820 (19) | 2.118 (19) | 2.9317 (19) | 171 (2)     |
|                                  | O2w-H1o2w...Cl1a                 | 0.82 (2)   | 2.34 (2)   | 3.1502 (15) | 172 (2)     |
|                                  | O2w-H2o2w...O2a                  | 0.820 (18) | 2.134 (19) | 2.9420 (18) | 168 (2)     |
|                                  | O3w-H1o3w...O1w                  | 0.820 (16) | 2.152 (16) | 2.939 (2)   | 161 (3)     |
|                                  | O3w-H2o3w...Cl1a                 | 1.04 (4)   | 2.22 (4)   | 3.214 (2)   | 160 (2)     |
|                                  | C18a-H2c18a...O2a <sup>ii</sup>  | 0.96       | 2.63       | 3.5525 (18) | 162         |
|                                  | C19a-H1c19a...O2w <sup>iii</sup> | 0.96       | 2.65       | 3.473 (2)   | 144         |
|                                  | C20a-H1c20a...O3w                | 0.96       | 2.49       | 3.190 (2)   | 130         |
|                                  | C22a-H1c22a...O2w <sup>ii</sup>  | 0.96       | 2.55       | 3.371 (2)   | 143         |
|                                  | C25a-H1c25a...O2w                | 0.96       | 2.57       | 3.464 (2)   | 154         |
|                                  | C25a-H2c25a...Cl1a               | 0.96       | 2.81       | 3.5919 (15) | 139         |
|                                  | C15b-H1c15b...Cl1b               | 0.96       | 2.86       | 3.5768 (15) | 133         |
|                                  | C16b-H1c16b...Cl1b <sup>i</sup>  | 0.96       | 2.91       | 3.7641 (14) | 149         |
|                                  | C18b-H2c18b...O1w <sup>iii</sup> | 0.96       | 2.65       | 3.501 (2)   | 149         |
|                                  | C19b-H1c19b...O2b <sup>iii</sup> | 0.96       | 2.60       | 3.5413 (19) | 168         |
|                                  | C22b-H2c22b...O1w <sup>ii</sup>  | 0.96       | 2.52       | 3.391 (2)   | 150         |
|                                  | C25b-H1c25b...Cl1b <sup>ii</sup> | 0.96       | 2.85       | 3.6412 (15) | 141         |
| C25b-H2c25b...O1w <sup>iii</sup> | 0.96                             | 2.67       | 3.576 (2)  | 158         |             |
| diHyd                            | O3-H1o3...O2w                    | 0.860 (15) | 1.816 (15) | 2.668 (2)   | 170.8 (17)  |
|                                  | O1w-H1o1w...Cl1                  | 0.860 (10) | 2.315 (12) | 3.1645 (12) | 169.7 (17)  |
|                                  | O1w-H2o1w...Cl1 <sup>i</sup>     | 0.860 (19) | 2.326 (19) | 3.1842 (13) | 175.8 (16)  |
|                                  | O2w-H1o2w...Cl1 <sup>i</sup>     | 0.860 (17) | 2.255 (17) | 3.1134 (14) | 176 (2)     |
|                                  | O2w-H2o2w...Cl1                  | 0.86 (2)   | 2.35 (2)   | 3.2030 (17) | 172 (2)     |
|                                  | C7-H1c7...O3 <sup>ii</sup>       | 0.96       | 2.58       | 3.475 (2)   | 156         |
|                                  | C15-H1c15...O1w <sup>iii</sup>   | 0.96       | 2.54       | 3.1822 (19) | 124         |
|                                  | C17-H1c17...O2 <sup>iv</sup>     | 0.96       | 2.38       | 3.2161 (18) | 145         |
|                                  | C20-H1c20...Cl1 <sup>ii</sup>    | 0.96       | 2.75       | 3.6590 (16) | 158         |
|                                  | C21-H1c21...Cl1                  | 0.96       | 2.82       | 3.6778 (15) | 149         |
|                                  | C22-H1c22...O3 <sup>v</sup>      | 0.96       | 2.64       | 3.3752 (19) | 134         |
|                                  | C22-H2c22...O2 <sup>v</sup>      | 0.96       | 2.51       | 3.1208 (18) | 121         |
|                                  | C25-H1c25...O1w <sup>iii</sup>   | 0.96       | 2.46       | 3.3428 (19) | 152         |
|                                  | C25-H2c25...O1w <sup>vi</sup>    | 0.96       | 2.67       | 3.433 (2)   | 137         |

Symmetry codes: sesHyd: (i)  $x,y+1,z$  (ii)  $x,-y+1/2,z+1/2$  (iii)  $x,-y+3/2,z+1/2$  diHyd: (i)  $x,-y-1/2,z+1/2$  (ii)  $x,-y-1/2,z-1/2$  (iii)  $-x+2,y+1/2,-z+3/2$  (iv)  $x,-y+1/2,z-1/2$  (v)  $x,y,z-1$  (vi)  $-x+2,-y,z+1$

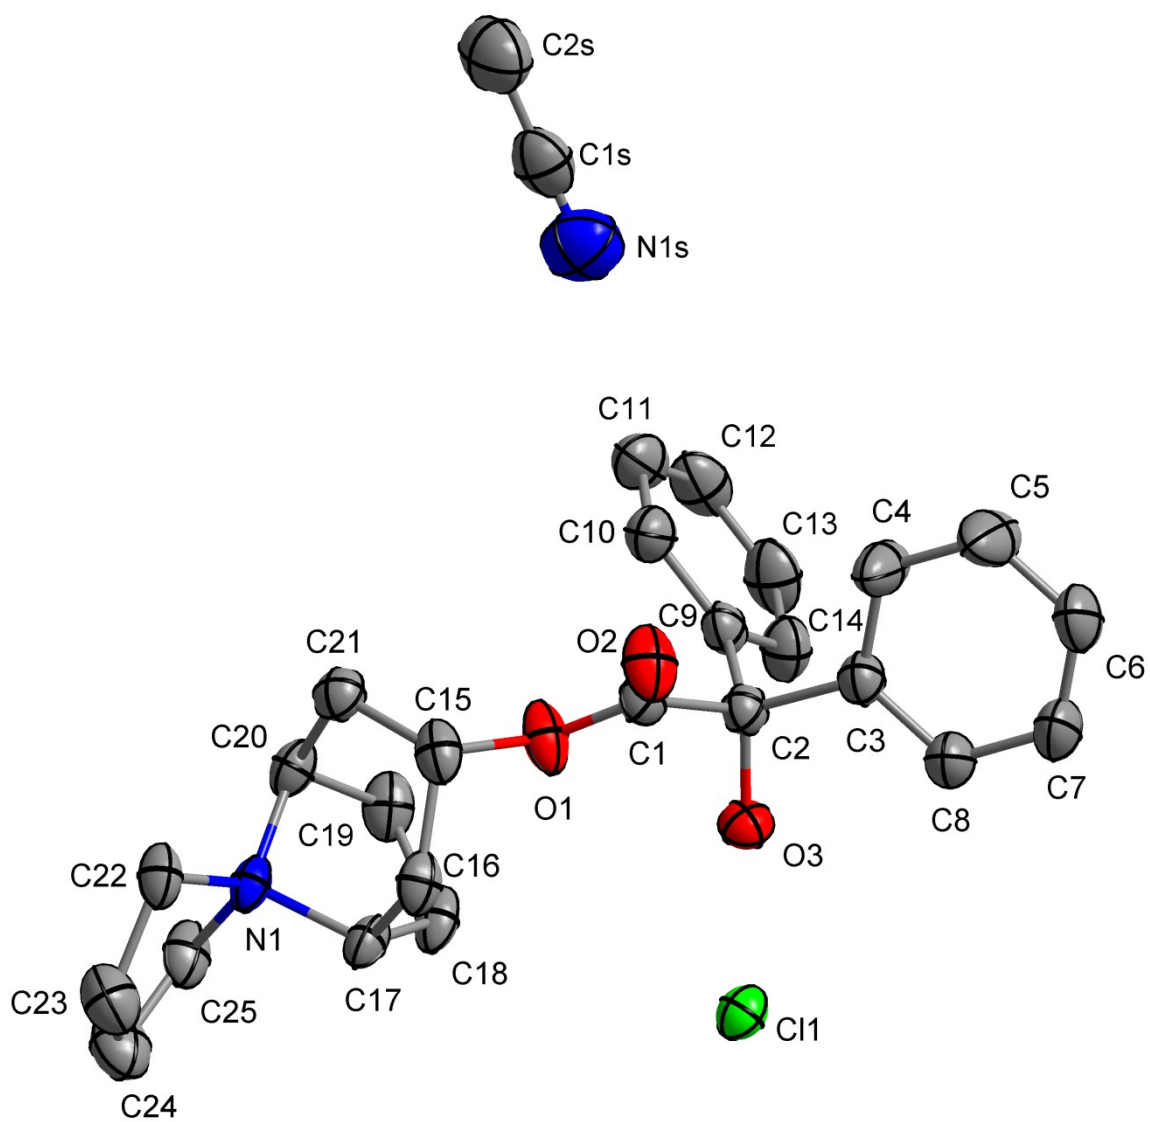

Figure 14. ORTEP of TCl ACN solvate (1).

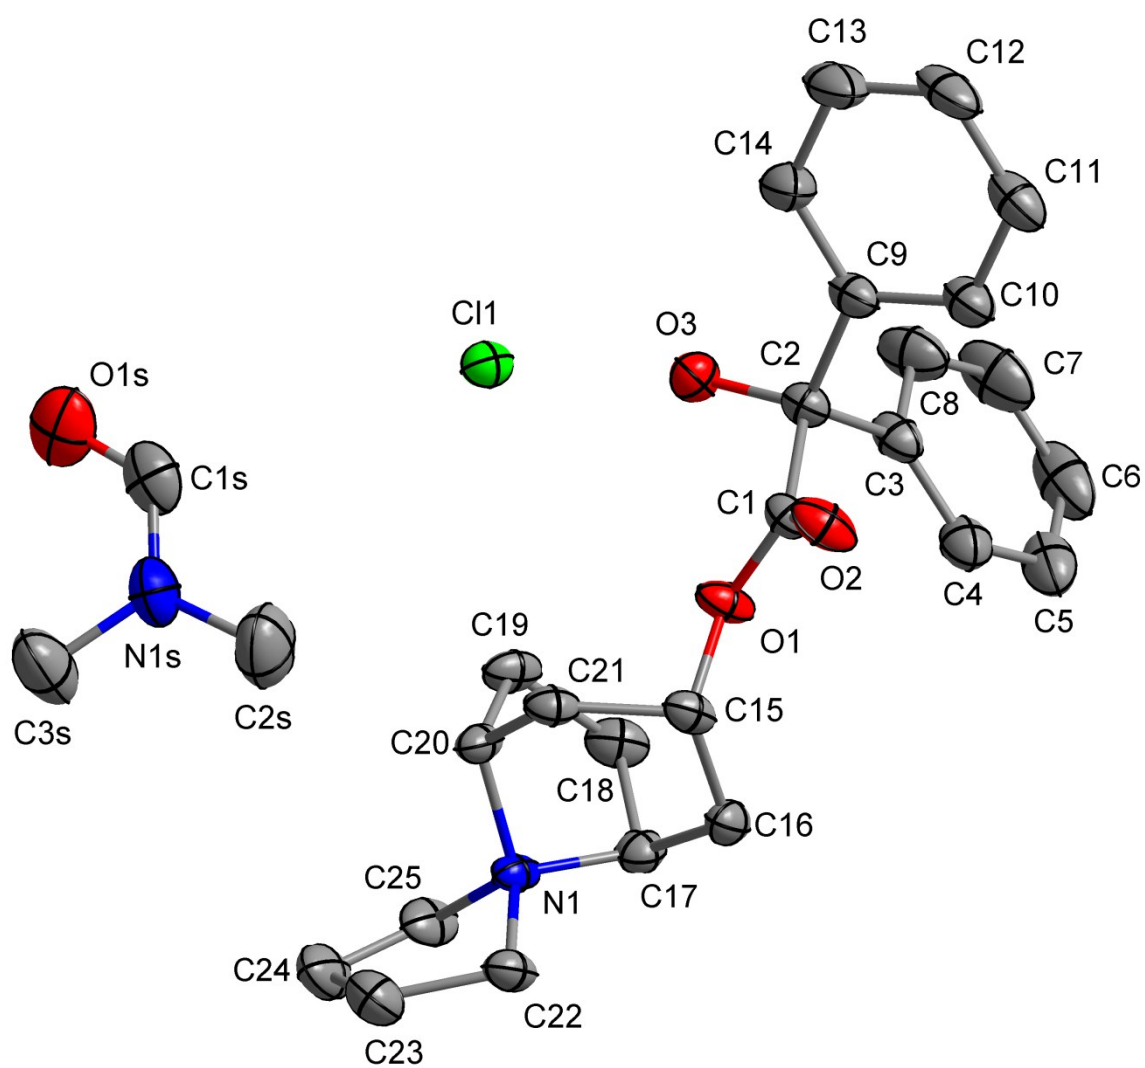

Figure 15. ORTEP of TCl DMF solvate (2).

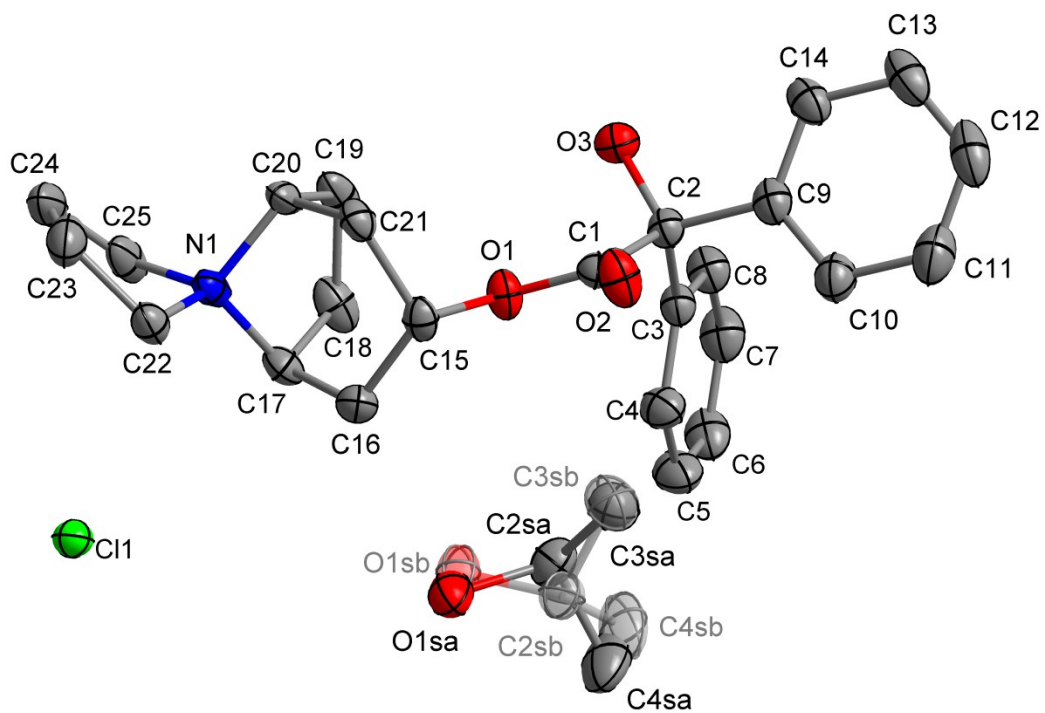

Figure 16. ORTEP of TCl *i*PrOH solvate (3).

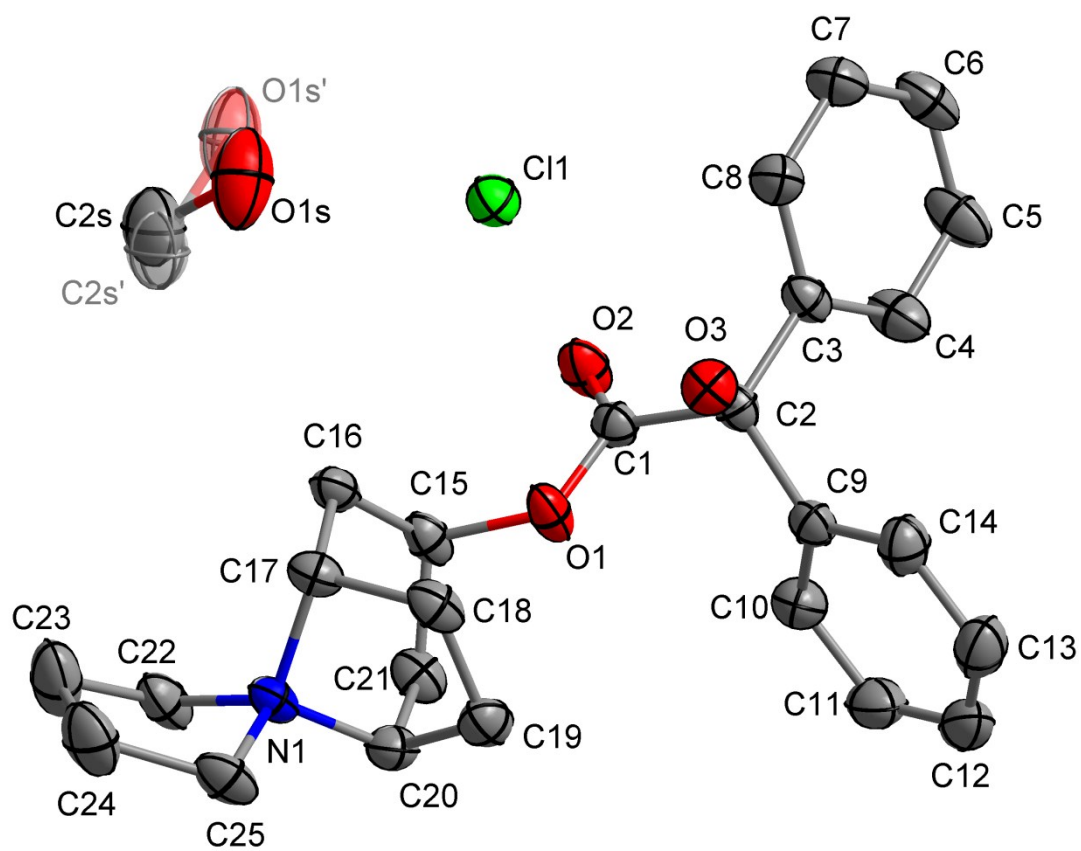

Figure 17. ORTEP of TCl MeOH solvate (4).

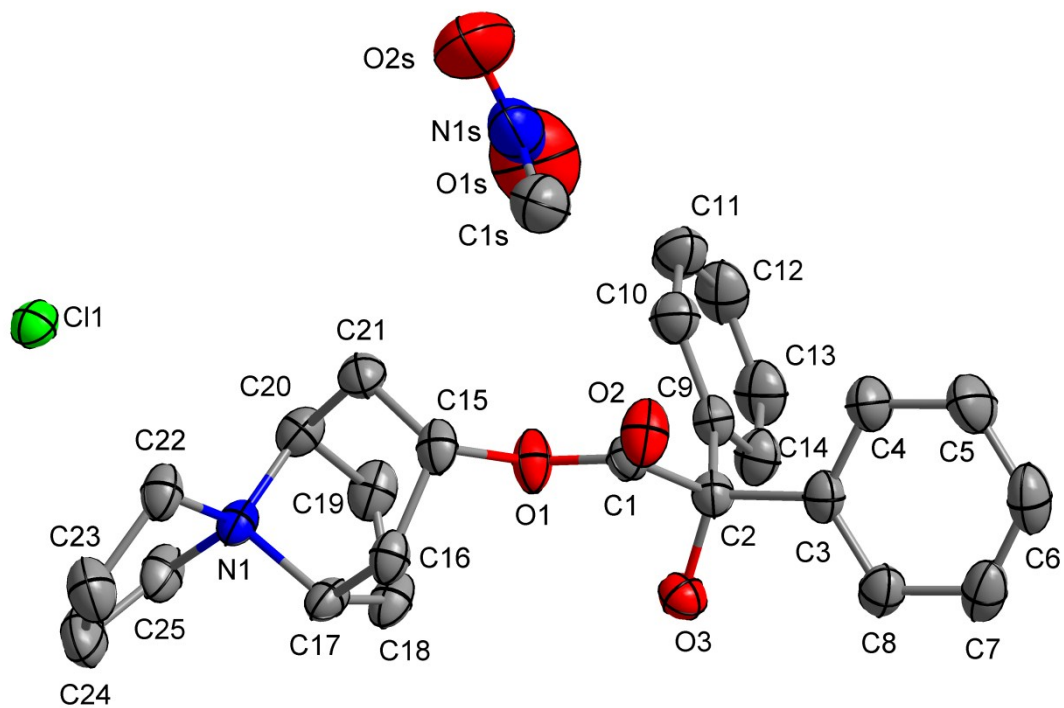

Figure 18. ORTEP of TCI MeNO<sub>2</sub> solvate (**5**).

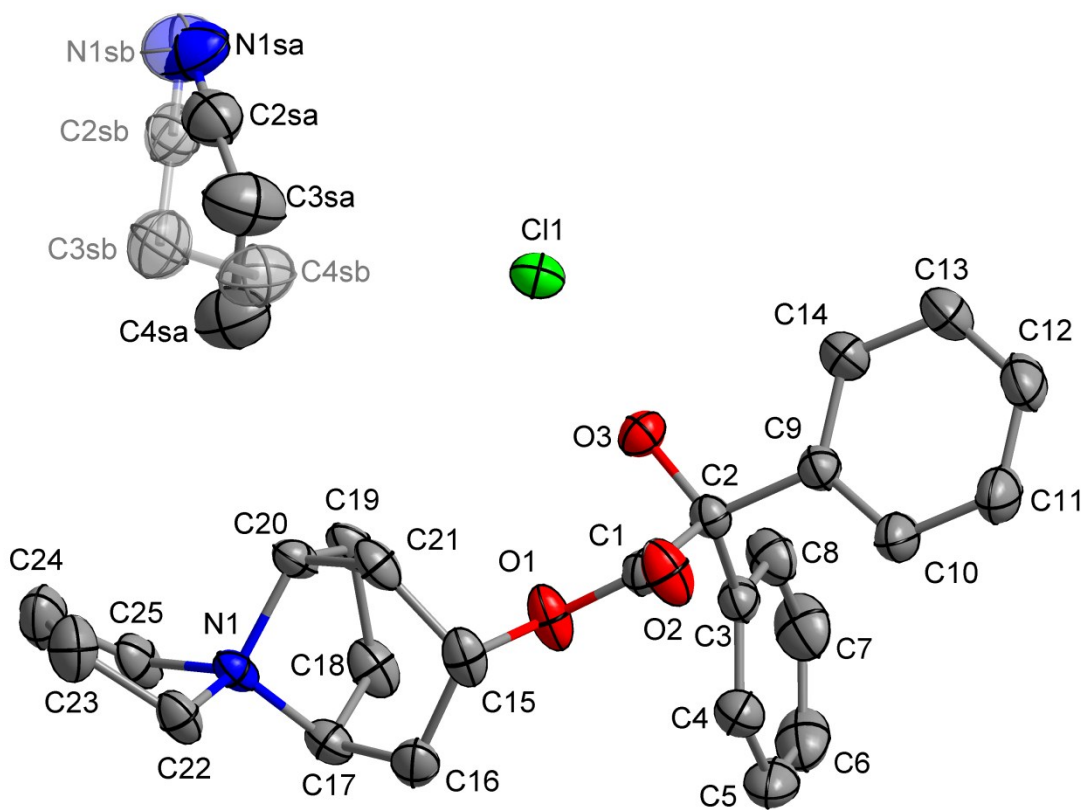

Figure 19. ORTEP of TCI PRN solvate (**6**).

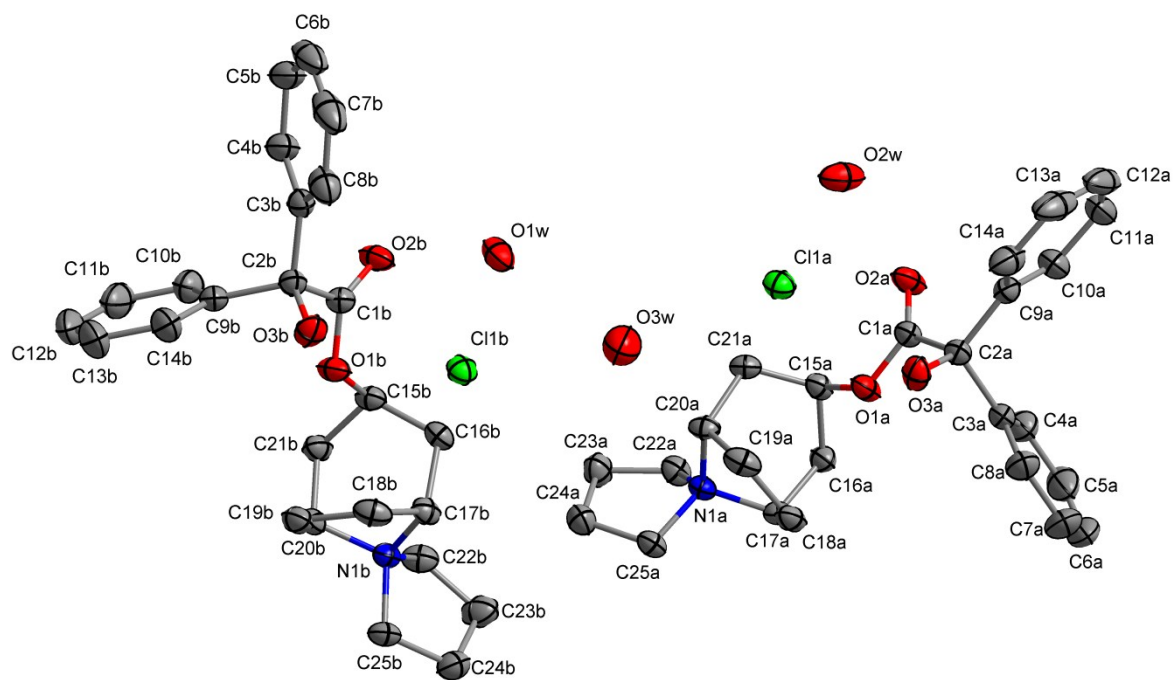

Figure 20. ORTEP of TCl sesquihydrate (7).

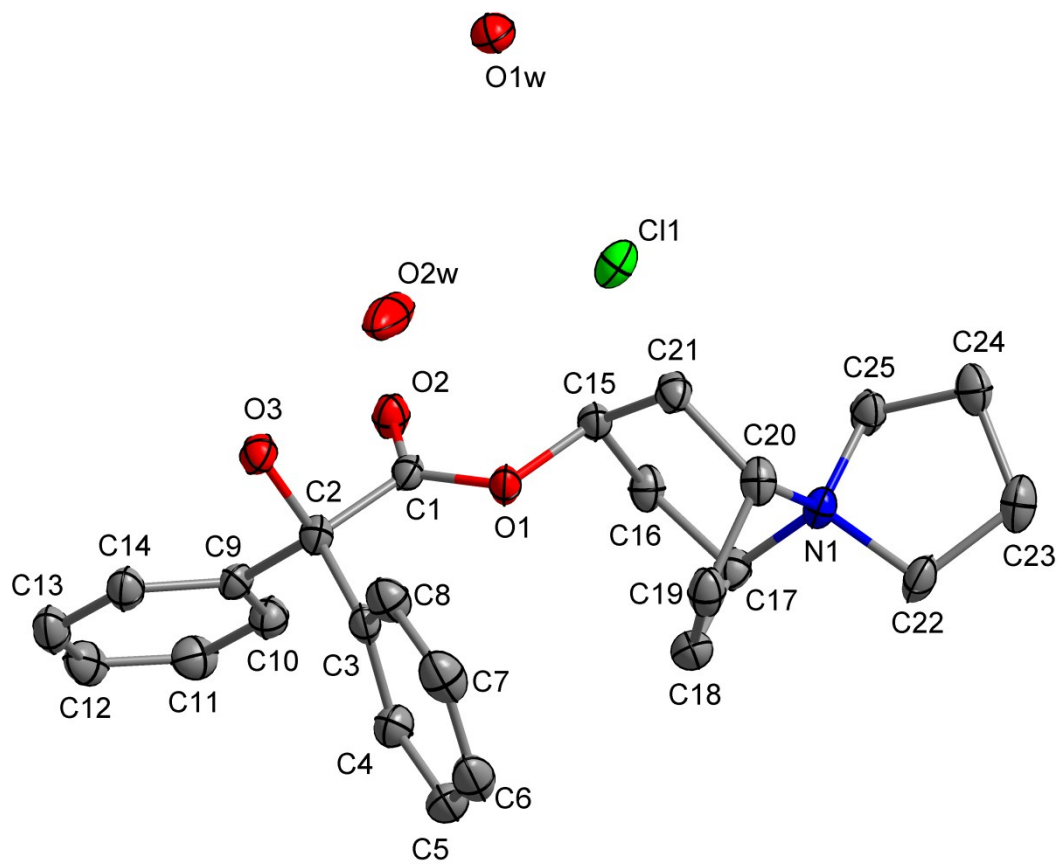

Figure 21. ORTEP of TCl dihydrate (8).
